# Supplementary material for: PRPF6 Induces the Alternative Splicing of lncRNA SNHG16 To Promote Progression and Paclitaxel Resistance of Ovarian Cancer via Regulating GATA3 Transcription
Source: Research Square preprint supplement (doi:10.21203/rs.3.rs-1045802/v1), 2021-11-15
Supplement: Supplementary file 1 [file ee186bc18ffa4b6cdb66df1b.xlsx]

## Sheet: Sheet1
	SNHG16-S			SNHG16-L
Variables	Low	High	P-value	Low	High	P-value
Age
<50	27	22	0.372	23	26	0.71
≥50	41	46		45	42
FIGO
I-II	33	10	0	12	31	0
III-IV	35	58		56	37
Differatiation
High	29	9	0.001	13	25	0.08
Moderate and Low	39	59		45	43
Lymph node metastasis
Negative	22	18	0.385	19	21	0.707
Positive	44	50		49	47
